# Supplementary material for: A fluorescent probe based on aptamer gold nanoclusters for rapid detection of mercury ions
Source: Royal Society of Chemistry journal article supplement (doi:10.1039/d3ay00967j), 2023-01-01
Supplement: d3ay00967j1.pdf [file d3ay00967j1.pdf]

Electronic Supplementary Material (ESI) for *Analytical Methods*

## Electronic Supplementary Material

### **A fluorescent probe based on aptamer gold nanoclusters for rapid detection of mercury ions**

Ying Wang <sup>a</sup>, Yinyu Xu <sup>c</sup>, Ruina Jiang <sup>a</sup>, Quanyong Dong <sup>a</sup>, Yingying Sun <sup>a</sup>, Wang Li <sup>a</sup>, Ying Xiong <sup>a</sup>, Yanni Chen <sup>a</sup>, Sili Yi <sup>b, \*</sup>, Qian Wen <sup>a, \*</sup>

<sup>a</sup> National Engineering Laboratory for Deep Processing of Rice and By-products, Hunan Key Laboratory of Processed Food for Special Medical Purpose, Hunan Key Laboratory of Forestry Edible Sources Safety and Processing, College of Food Science and Engineering, Central South University of Forestry and Technology, Changsha 410004, PR China. Hunan Provincial Key Laboratory of Food Safety Monitoring and Early Warning, Hunan Institute Food Quality Supervision Inspection and Research, Changsha 410004, PR China.

<sup>b</sup> School of Chemistry and Materials Science, Huaihua University, Huaihua, 418000, PR China.

<sup>c</sup> Research Institute of Commodity Quality Inspection in Hunan, Changsha, 410004, PR China.

\*Corresponding author.

E-mail address: ysl@hhtc.edu.cn, wenqian\_1104@163.com

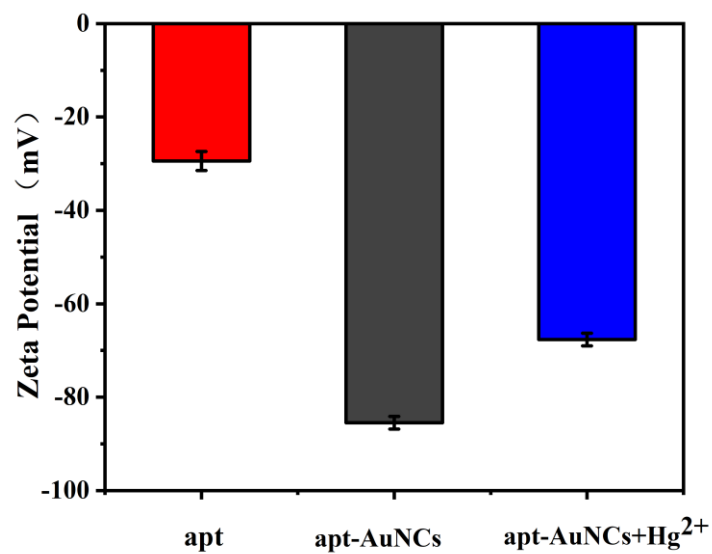

**Fig. S1. Zeta-potential changes of apt-AuNCs solutions treated in the presence of or in the absence of Hg<sup>2+</sup>.**

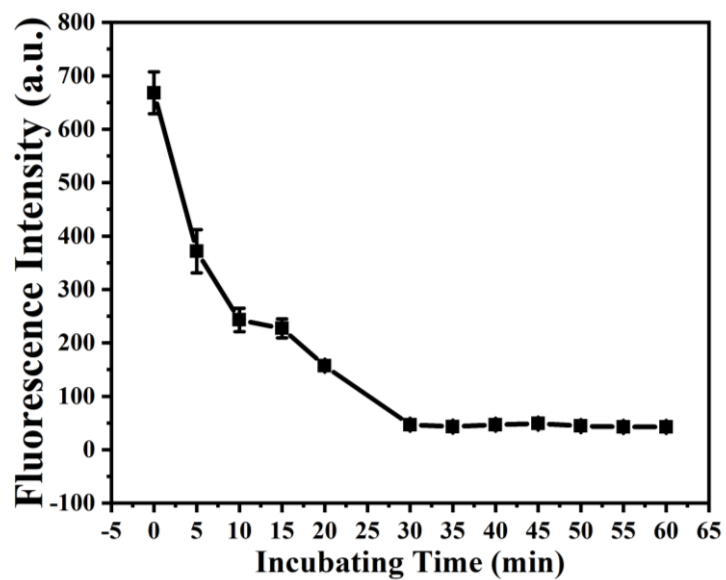

**Fig. S2. Optimization of incubation Time.**
